# Supplementary material
Source: HighWire-hosted journal article supplement (https://rmdopen.bmj.com/content/9/2/e002912)
Supplement: inline-supplementary-material-1 [file inline-supplementary-material-1.pdf]

**Supplemental Table 1: Differences male and female patients**

|                                                              | Total<br>(n=330)             | Female<br>n=147 (44,5%)    | Male<br>n=183 (55,5%)      | P value          |
|--------------------------------------------------------------|------------------------------|----------------------------|----------------------------|------------------|
| Age, years, mean (SD)                                        | 53.3 (14.0)                  | 53.3 (14.7)                | 53.3 (13.5)                | 0.968            |
| BMI, kg/m <sup>2</sup> , mean (SD)                           | 27.3 (6.15)                  | 27.0 (6.41)                | 27.5 (5.94)                | 0.515            |
| Smokers, n (%) (n=311)                                       | 69 (22.2%)                   | 33 (23.1%)                 | 36 (21.4%)                 | 0.727            |
| PsA /axSpA, n (%)                                            | 168 (50.9%) /<br>162 (49.1%) | 79 (53.7%) /<br>68 (46.3%) | 89 (48.6%) /<br>94 (51.4%) | 0.356            |
| HLA B27, n (%) (n=244)                                       | 128 (52.5%)                  | 49 (45.4%)                 | 79 (58.1%)                 | <b>0.048</b>     |
| Disease domains:                                             |                              |                            |                            |                  |
| Axial involvement, n (%)                                     | 220 (66.9%)                  | 97 (66.0%)                 | 123 (67.6%)                | 0.760            |
| Peripheral arthritis, n (%)                                  | 273 (83.2%)                  | 127 (87.6%)                | 146 (79.8%)                | 0.060            |
| Enthesitis, n (%)                                            | 134 (40.7%)                  | 68 (46.3%)                 | 66 (36.3%)                 | 0.067            |
| Dactylitis, n (%)                                            | 84 (25.5%)                   | 38 (25.9%)                 | 46 (25.1%)                 | 0.882            |
| CRP, mg/l, mean (SD)                                         | 6.10 (11.7)                  | 5.92 (6.04)                | 6.24 (14.8)                | 0.806            |
| Disease duration, years, mean (SD)                           | 11.3 (9.29)                  | 10.6 (8.60)                | 11.9 (9.78)                | 0.209            |
| Functional capacity (FFbH), % (n=325)                        | 79.1 %                       | 75.3 %                     | 82.2%                      | <b>0.003</b>     |
| Significant functional impairment (FFbH <60%), n (%) (n=325) | 55 (17.0%)                   | 29 (19.9%)                 | 26 (14.6%)                 | 0.210            |
| Therapy:                                                     |                              |                            |                            |                  |
| csDMARD, n (%)                                               | 114 (34.8%)                  | 55 (37.7%)                 | 59 (32.4%)                 | 0.321            |
| bDMARD, n (%)                                                | 224 (68.1%)                  | 95 (64.6%)                 | 129 (70.9%)                | 0.226            |
| Anti-TNF, n (%)                                              | 144 (43.8%)                  | 56 (38.1%)                 | 88 (48.4%)                 | 0.062            |
| Anti-IL17, n (%)                                             | 66 (20.1%)                   | 31 (21.1%)                 | 35 (19.2%)                 | 0.676            |
| Glucocorticoids, n (%)                                       | 29 (8.9%)                    | 15 (10.3%)                 | 14 (7.8%)                  | 0.431            |
| NSAID monotherapy, n (%)                                     | 35 (10.6%)                   | 17 (11.6%)                 | 18 (9.8%)                  | 0.612            |
| No current therapy, n (%)                                    | 26 (7.9 %)                   | 13 (8.8%)                  | 13 (7.1%)                  | 0.560            |
| Abnormal sleep behaviour, n (%) (n=313)                      | 146 (46.6%)                  | 80 (55.9%)                 | 66 (38.8%)                 | <b>&lt;0.001</b> |
| Inability to sleep through the night, n (%)                  | 154 (49.6%)                  | 81 (56.6%)                 | 73 (43.7%)                 | <b>0.014</b>     |
| Waking too early, n (%)                                      | 99 (32.1%)                   | 47 (33.1%)                 | 52 (31.3%)                 | 0.465            |
| Need for sleeping pills, n (%)                               | 20 (6.5%)                    | 13 (9.2%)                  | 7 (4.1%)                   | <b>0.047</b>     |
| Unrefreshing sleep, n (%)                                    | 36 (11.6%)                   | 25 (17.6%)                 | 11 (6.5%)                  | <b>&lt;0.001</b> |
| WHO-QOL BREF: (n=327)                                        |                              |                            |                            |                  |
| Physical HRQOL, D1, mean (SD)                                | 60.5 (19.5)                  | 57.6 (19.6)                | 62.9 (19.1)                | <b>0.015</b>     |
| Mental HRQOL, D2, mean (SD)                                  | 67.7 (17.3)                  | 64.2 (17.9)                | 70.5 (16.3)                | <b>&lt;0.001</b> |
| Social QOL, D3, mean (SD)                                    | 68.0 (19.7)                  | 67.4 (19.3)                | 68.5 (20.0)                | 0.623            |
| Environmental QOL, D4, mean (SD)                             | 77.4 (13.4)                  | 76.7 (13.7)                | 78.0 (13.1)                | 0.377            |
| Depressive Symptoms: (n=307)                                 |                              |                            |                            |                  |
| BDI-II score, mean (SD)                                      | 11.2 (9.4)                   | 12.7 (9.92)                | 10.0 (8.78)                | <b>0.015</b>     |
| No depression, n (%)                                         | 142 (46.0)                   | 56 (40.0)                  | 86 (51.5)                  | } <b>0.019</b>   |
| Minimal or mild depression, n (%)                            | 115 (37.5)                   | 55 (39.3)                  | 60 (35.9)                  |                  |
| Moderate to severe depression, n (%)                         | 50 (16.3)                    | 29 (20.7)                  | 21 (12.6)                  |                  |

The number (n) for individual items is given in the left column for parameters, for which data from individual patients were missing. P values refer to comparison of female and male patients. Abbreviations: SD standard deviation, n number, BMI body mass index, csDMARD conventional synthetic disease modifying antirheumatic drug, bDMARD biological DMARD, NSAID non-steroidal anti-inflammatory drug.

**Supplemental Table 2: Multiple linear regression analysis of factors associated with RIS score.**

| SpA (whole cohort)                                                             | Predictors                   | $\beta$       | 95% CI for $\beta$ | B    | SE     | p      |
|--------------------------------------------------------------------------------|------------------------------|---------------|--------------------|------|--------|--------|
|                                                                                | Depressive symptoms (BDI-II) | 0.43          | 0.32 – 0.54        | 0.30 | 0.04   | <0.001 |
| Functional capacity (FFbH)                                                     | -0.21                        | -0.33 – -0.09 | -0.07              | 0.02 | <0.001 |        |
| Female sex                                                                     | 0.27                         | 0.07 – 0.47   | 1.76               | 0.66 | 0.008  |        |
| Axial involvement                                                              | 0.27                         | 0.06 – 0.48   | 1.76               | 0.70 | 0.012  |        |
| $R^2$ 0.378, adj. $R^2$ 0.355, $F(10, 277) = 16.72$ , $p < 0.001$ <sup>1</sup> |                              |               |                    |      |        |        |

<sup>1</sup>Linear regression adjusted for age, disease duration, BMI, smoking status, as well as comorbidities (chronic lung disease, chronic kidney disease). Abbreviations:  $\beta$  standardized estimate, CI confidence interval, B estimate SE standard error.
